# Supplementary material for: Perspective on advanced nanomaterials used for energy storage and conversion
Source: publisher site journal article supplement (doi:10.1515/pac-2021-0802), 2021-12-06
Supplement: Supplementary file 1 [file j_pac-2021-0802_suppl.docx]

**Author Contribution.**

H. Huang, a graduate student, did the research related to hydrogenase, R. Li as a collaborator on microwave absorption and ammonia synthesis. C. Li, a collaborator on a synthesis of reduced graphene oxide and metal oxides. F. Zheng, a collaborator on supercapacitor design and evaluation. G. A. Ramirez, a graduate student on microbial fuel cell evaluation. W. Houf, an undergraduate student on the protonic membrane synthesis, Q. Zhen, a collaborator on project overview, S. Bashir, a colleague from TAMUK on data collection and analysis, and myself on the origination of the research concept or actual execution of the experimental work or exposition of the research in manuscript format.
